# Supplementary material for: Developmental Relations Between Internalising Problems and ADHD in Childhood: a Symptom Level Perspective
Source: Res Child Adolesc Psychopathol. 2021 Aug 7;49(12):1567–79. doi: 10.1007/s10802-021-00856-3 (PMC8557182; doi:10.1007/s10802-021-00856-3)
Supplement: Supplementary file 1 — Supplementary file1 (CSV 14 KB) [file 10802_2021_856_MOESM1_ESM.csv]

Developmental Relations between Internalising Problems and ADHD in Childhood: A Symptom Level Perspective Submitted to Journal of Abnormal Child Psychology
	NER Age 7 - Parent	ANX Age 7 - Parent	WOR Age 7 - Parent	DEP Age 7 - Parent	NHA Age 7 - Parent	TEN Age 7 - Parent	DIS Age 7 - Parent	IMP Age 7 - Parent	DWA Age 7 - Parent	RES Age 7 - Parent	FID Age 7 - Parent	CSE Age 7 - Parent	DTB Age 7 - Parent	CON Age 7 - Parent	INA Age 7 - Parent	NER Age 9 - Parent	ANX Age 9 - Parent	WOR Age 9 - Parent	DEP Age 9 - Parent	NHA Age 9 - Parent	TEN Age 9 - Parent	DIS Age 9 - Parent	IMP Age 9 - Parent	DWA Age 9 - Parent	RES Age 9 - Parent	FID Age 9 - Parent	CSE Age 9 - Parent	DTB Age 9 - Parent	CON Age 9 - Parent	INA Age 9 - Parent	NER Age 11 - Parent	ANX Age 11 - Parent	WOR Age 11 - Parent	DEP Age 11 - Parent	NHA Age 11 - Parent	TEN Age 11 - Parent	DIS Age 11 - Parent	IMP Age 11 - Parent	DWA Age 11 - Parent	RES Age 11 - Parent	FID Age 11 - Parent	CSE Age 11 - Parent	DTB Age 11 - Parent	CON Age 11 - Parent	INA Age 11 - Parent
NER Age 7 - Parent	NA	<0.001	<0.001	<0.001	<0.001	<0.001	<0.001	<0.001	<0.001	<0.001	<0.001	<0.001	<0.001	<0.001	<0.001	<0.001	<0.001	<0.001	<0.001	<0.001	<0.001	<0.001	<0.001	<0.001	<0.001	<0.001	<0.001	<0.001	<0.001	0.050	<0.001	<0.001	<0.001	0.110	<0.001	0.550	<0.001	<0.001	0.080	<0.001	<0.001	0.010	0.080	<0.001	0.040
ANX Age 7 - Parent	0.310	NA	<0.001	<0.001	<0.001	<0.001	<0.001	0.999	<0.001	0.200	0.020	<0.001	<0.001	<0.001	<0.001	<0.001	<0.001	<0.001	0.010	0.020	0.010	<0.001	0.999	0.999	0.999	0.999	0.010	<0.001	<0.001	0.999	<0.001	<0.001	<0.001	0.020	0.010	<0.001	<0.001	0.999	0.999	0.999	0.999	0.999	0.999	0.700	0.500
WOR Age 7 - Parent	0.350	0.290	NA	<0.001	<0.001	<0.001	<0.001	0.370	<0.001	<0.001	<0.001	<0.001	<0.001	<0.001	<0.001	<0.001	<0.001	<0.001	<0.001	<0.001	<0.001	<0.001	0.100	0.999	0.020	0.120	<0.001	0.080	<0.001	0.999	<0.001	<0.001	<0.001	0.020	<0.001	0.010	<0.001	0.999	0.999	0.999	0.550	0.999	0.999	0.999	0.510
DEP Age 7 - Parent	0.250	0.250	0.350	NA	<0.001	<0.001	<0.001	0.010	<0.001	0.060	0.040	0.050	<0.001	<0.001	<0.001	<0.001	<0.001	<0.001	<0.001	<0.001	<0.001	<0.001	0.130	0.470	0.999	0.999	0.999	0.110	<0.001	<0.001	<0.001	0.020	<0.001	<0.001	<0.001	<0.001	<0.001	0.999	0.999	0.999	0.999	0.999	0.999	0.999	<0.001
NHA Age 7 - Parent	0.250	0.200	0.270	0.430	NA	<0.001	<0.001	0.070	<0.001	0.120	0.070	0.060	<0.001	<0.001	<0.001	<0.001	0.999	<0.001	<0.001	<0.001	<0.001	<0.001	0.420	0.380	<0.001	0.790	0.610	0.010	<0.001	0.020	<0.001	0.999	<0.001	<0.001	<0.001	<0.001	<0.001	0.150	0.999	0.999	0.999	0.999	0.999	0.999	0.460
TEN Age 7 - Parent	0.180	0.170	0.220	0.350	0.410	NA	<0.001	0.999	<0.001	0.600	0.999	<0.001	0.220	<0.001	0.010	0.020	0.080	0.160	<0.001	<0.001	<0.001	<0.001	0.999	0.999	0.999	0.999	0.999	0.999	0.999	0.999	0.030	0.999	0.150	0.010	<0.001	<0.001	<0.001	0.999	0.999	0.999	0.999	0.999	0.999	0.999	0.460
DIS Age 7 - Parent	0.230	0.180	0.290	0.450	0.360	0.310	NA	0.450	<0.001	0.010	0.180	<0.001	<0.001	0.010	<0.001	<0.001	<0.001	0.010	<0.001	<0.001	<0.001	<0.001	0.999	0.999	0.999	0.050	0.999	0.640	0.220	0.999	<0.001	0.270	0.100	<0.001	<0.001	<0.001	<0.001	0.999	0.999	0.999	0.700	0.999	0.999	0.999	0.999
IMP Age 7 - Parent	0.150	0.050	0.100	0.130	0.110	0.090	0.080	NA	<0.001	<0.001	<0.001	<0.001	<0.001	<0.001	<0.001	<0.001	0.999	0.280	0.010	0.070	0.999	0.050	<0.001	<0.001	<0.001	<0.001	<0.001	<0.001	<0.001	<0.001	<0.001	0.999	0.650	0.999	0.030	0.999	0.040	<0.001	<0.001	<0.001	<0.001	<0.001	<0.001	<0.001	<0.001
DWA Age 7 - Parent	0.210	0.110	0.150	0.110	0.140	0.150	0.160	0.310	NA	<0.001	<0.001	<0.001	<0.001	<0.001	<0.001	<0.001	0.999	0.030	0.060	0.999	0.999	<0.001	<0.001	<0.001	<0.001	<0.001	<0.001	<0.001	<0.001	<0.001	<0.001	0.720	0.080	0.999	<0.001	0.999	0.470	<0.001	<0.001	<0.001	<0.001	<0.001	<0.001	<0.001	<0.001
RES Age 7 - Parent	0.310	0.080	0.150	0.100	0.100	0.060	0.090	0.220	0.270	NA	<0.001	<0.001	<0.001	<0.001	<0.001	<0.001	<0.001	0.210	0.590	0.999	0.999	0.999	<0.001	<0.001	<0.001	<0.001	<0.001	<0.001	<0.001	<0.001	<0.001	0.999	0.180	0.999	0.770	0.999	0.100	<0.001	<0.001	<0.001	<0.001	<0.001	<0.001	<0.001	<0.001
FID Age 7 - Parent	0.290	0.100	0.150	0.100	0.100	0.070	0.080	0.250	0.220	0.590	NA	<0.001	<0.001	<0.001	<0.001	<0.001	0.030	<0.001	0.999	0.999	0.999	0.480	<0.001	<0.001	<0.001	<0.001	<0.001	<0.001	<0.001	<0.001	<0.001	0.010	<0.001	0.999	0.670	0.999	0.480	<0.001	<0.001	<0.001	<0.001	<0.001	<0.001	<0.001	<0.001
CSE Age 7 - Parent	0.240	0.150	0.140	0.090	0.100	0.130	0.140	0.200	0.260	0.320	0.280	NA	<0.001	<0.001	<0.001	<0.001	<0.001	0.999	0.999	0.220	0.830	0.440	<0.001	<0.001	<0.001	<0.001	<0.001	<0.001	<0.001	<0.001	<0.001	<0.001	0.999	0.999	0.010	0.999	0.010	<0.001	<0.001	<0.001	<0.001	<0.001	<0.001	<0.001	<0.001
DTB Age 7 - Parent	0.260	0.200	0.160	0.130	0.170	0.090	0.130	0.300	0.320	0.370	0.300	0.480	NA	<0.001	<0.001	<0.001	0.120	0.310	0.130	0.020	0.670	0.999	<0.001	<0.001	<0.001	<0.001	<0.001	<0.001	<0.001	<0.001	<0.001	0.030	<0.001	0.020	<0.001	0.999	<0.001	<0.001	<0.001	<0.001	<0.001	<0.001	<0.001	<0.001	<0.001
CON Age 7 - Parent	0.260	0.150	0.150	0.140	0.180	0.170	0.100	0.250	0.320	0.380	0.350	0.520	0.590	NA	<0.001	<0.001	0.999	0.510	0.760	0.130	0.580	0.999	<0.001	<0.001	<0.001	<0.001	<0.001	<0.001	<0.001	<0.001	<0.001	0.510	0.060	0.770	<0.001	0.999	<0.001	<0.001	<0.001	<0.001	<0.001	<0.001	<0.001	<0.001	<0.001
INA Age 7 - Parent	0.210	0.170	0.150	0.200	0.200	0.170	0.160	0.350	0.280	0.270	0.260	0.320	0.470	0.480	NA	<0.001	0.999	0.050	<0.001	<0.001	0.050	0.390	<0.001	<0.001	<0.001	<0.001	<0.001	<0.001	<0.001	<0.001	<0.001	0.500	<0.001	0.550	<0.001	0.380	<0.001	<0.001	<0.001	<0.001	<0.001	<0.001	<0.001	<0.001	<0.001
NER Age 9 - Parent	0.420	0.220	0.260	0.160	0.180	0.090	0.150	0.130	0.190	0.240	0.240	0.210	0.220	0.220	0.150	NA	<0.001	<0.001	<0.001	<0.001	<0.001	<0.001	<0.001	<0.001	<0.001	<0.001	<0.001	<0.001	<0.001	<0.001	<0.001	<0.001	<0.001	<0.001	<0.001	<0.001	<0.001	<0.001	<0.001	<0.001	<0.001	<0.001	<0.001	<0.001	<0.001
ANX Age 9 - Parent	0.160	0.450	0.170	0.180	0.090	0.100	0.140	<0.001	0.060	0.130	0.100	0.140	0.100	0.060	0.070	0.250	NA	<0.001	<0.001	<0.001	<0.001	<0.001	0.010	0.010	0.050	<0.001	<0.001	<0.001	<0.001	0.999	<0.001	<0.001	<0.001	<0.001	<0.001	0.020	<0.001	0.999	0.890	0.999	0.999	0.999	0.999	0.999	0.999
WOR Age 9 - Parent	0.260	0.210	0.350	0.250	0.160	0.080	0.110	0.100	0.090	0.070	0.130	0.050	0.100	0.070	0.090	0.390	0.260	NA	<0.001	<0.001	<0.001	<0.001	<0.001	0.140	<0.001	<0.001	0.020	<0.001	<0.001	<0.001	<0.001	<0.001	<0.001	<0.001	<0.001	<0.001	<0.001	<0.001	0.130	<0.001	0.310	<0.001	0.100	<0.001	0.030
DEP Age 9 - Parent	0.210	0.130	0.230	0.320	0.300	0.170	0.230	0.140	0.100	0.080	0.080	0.070	0.110	0.100	0.130	0.330	0.220	0.440	NA	<0.001	<0.001	<0.001	<0.001	<0.001	<0.001	<0.001	<0.001	<0.001	<0.001	<0.001	<0.001	<0.001	<0.001	<0.001	<0.001	<0.001	<0.001	<0.001	0.890	0.010	0.430	0.130	<0.001	<0.001	<0.001
NHA Age 9 - Parent	0.190	0.140	0.220	0.300	0.390	0.220	0.220	0.110	0.070	0.050	0.060	0.110	0.130	0.130	0.140	0.290	0.130	0.370	0.510	NA	<0.001	<0.001	<0.001	<0.001	<0.001	0.770	<0.001	<0.001	<0.001	<0.001	<0.001	0.160	<0.001	<0.001	<0.001	<0.001	<0.001	<0.001	0.030	<0.001	0.999	<0.001	<0.001	<0.001	<0.001
TEN Age 9 - Parent	0.190	0.120	0.170	0.210	0.310	0.360	0.170	0.070	0.080	0.040	0.040	0.070	0.100	0.090	0.110	0.220	0.140	0.260	0.330	0.440	NA	<0.001	0.010	<0.001	0.999	0.999	<0.001	<0.001	<0.001	<0.001	<0.001	0.060	<0.001	<0.001	<0.001	<0.001	<0.001	0.999	0.010	0.999	0.999	<0.001	0.420	0.790	<0.001
DIS Age 9 - Parent	0.210	0.160	0.230	0.280	0.290	0.160	0.230	0.110	0.100	0.050	0.070	0.080	0.080	0.050	0.090	0.340	0.170	0.390	0.540	0.480	0.350	NA	<0.001	<0.001	<0.001	<0.001	<0.001	<0.001	<0.001	<0.001	<0.001	<0.001	<0.001	<0.001	<0.001	<0.001	<0.001	0.010	0.020	0.030	0.240	<0.001	<0.001	<0.001	<0.001
IMP Age 9 - Parent	0.160	0.070	0.080	0.090	0.070	0.040	0.070	0.500	0.240	0.220	0.280	0.200	0.290	0.250	0.280	0.270	0.110	0.160	0.180	0.150	0.090	0.180	NA	<0.001	<0.001	<0.001	<0.001	<0.001	<0.001	<0.001	<0.001	0.999	<0.001	0.050	<0.001	0.130	<0.001	<0.001	<0.001	<0.001	<0.001	<0.001	<0.001	<0.001	<0.001
DWA Age 9 - Parent	0.180	0.050	0.080	0.090	0.110	0.070	0.030	0.260	0.370	0.280	0.200	0.230	0.260	0.240	0.230	0.250	0.110	0.080	0.140	0.130	0.150	0.160	0.300	NA	<0.001	<0.001	<0.001	<0.001	<0.001	<0.001	<0.001	0.040	0.999	0.100	0.220	0.990	0.090	<0.001	<0.001	<0.001	<0.001	<0.001	<0.001	<0.001	<0.001
RES Age 9 - Parent	0.210	0.050	0.120	0.060	0.140	0.030	0.030	0.190	0.240	0.480	0.450	0.300	0.330	0.330	0.220	0.370	0.110	0.170	0.200	0.160	0.070	0.200	0.330	0.380	NA	<0.001	<0.001	<0.001	<0.001	<0.001	<0.001	0.030	<0.001	<0.001	<0.001	0.999	0.010	<0.001	<0.001	<0.001	<0.001	<0.001	<0.001	<0.001	<0.001
FID Age 9 - Parent	0.170	-0.030	0.090	0.050	0.090	0.030	0.100	0.260	0.230	0.460	0.470	0.210	0.240	0.260	0.200	0.320	0.100	0.110	0.150	0.070	0.040	0.120	0.380	0.330	0.610	NA	<0.001	<0.001	<0.001	<0.001	<0.001	0.220	0.060	0.720	0.420	0.999	0.150	<0.001	<0.001	<0.001	<0.001	<0.001	<0.001	<0.001	<0.001
CSE Age 9 - Parent	0.140	0.120	0.120	0.060	0.070	0.030	0.070	0.200	0.210	0.290	0.250	0.390	0.370	0.330	0.230	0.300	0.150	0.090	0.170	0.160	0.190	0.160	0.340	0.330	0.420	0.360	NA	<0.001	<0.001	<0.001	<0.001	<0.001	<0.001	<0.001	<0.001	<0.001	<0.001	<0.001	<0.001	<0.001	<0.001	<0.001	<0.001	<0.001	<0.001
DTB Age 9 - Parent	0.170	0.150	0.090	0.100	0.130	0.010	0.070	0.260	0.230	0.300	0.270	0.330	0.470	0.390	0.340	0.310	0.100	0.120	0.170	0.170	0.140	0.190	0.390	0.330	0.400	0.380	0.580	NA	<0.001	<0.001	<0.001	0.110	<0.001	<0.001	<0.001	0.320	<0.001	<0.001	<0.001	<0.001	<0.001	<0.001	<0.001	<0.001	<0.001
CON Age 9 - Parent	0.180	0.140	0.170	0.140	0.140	0.040	0.070	0.200	0.210	0.270	0.250	0.360	0.430	0.410	0.310	0.310	0.100	0.160	0.210	0.210	0.130	0.200	0.380	0.320	0.460	0.380	0.610	0.690	NA	<0.001	<0.001	0.010	<0.001	<0.001	<0.001	0.190	<0.001	<0.001	<0.001	<0.001	<0.001	<0.001	<0.001	<0.001	<0.001
INA Age 9 - Parent	0.140	0.080	0.100	0.150	0.110	0.070	0.020	0.240	0.180	0.190	0.190	0.220	0.320	0.320	0.360	0.280	0.050	0.210	0.280	0.220	0.190	0.250	0.350	0.260	0.320	0.220	0.400	0.510	0.510	NA	<0.001	0.999	<0.001	<0.001	<0.001	<0.001	<0.001	<0.001	<0.001	<0.001	<0.001	<0.001	<0.001	<0.001	<0.001
NER Age 11 - Parent	0.350	0.150	0.200	0.160	0.170	0.120	0.150	0.190	0.180	0.250	0.230	0.220	0.210	0.190	0.180	0.490	0.220	0.250	0.240	0.260	0.180	0.260	0.240	0.210	0.320	0.300	0.300	0.270	0.280	0.260	NA	<0.001	<0.001	<0.001	<0.001	<0.001	<0.001	<0.001	<0.001	<0.001	<0.001	<0.001	<0.001	<0.001	<0.001
ANX Age 11 - Parent	0.220	0.420	0.190	0.130	0.090	0.060	0.090	0.020	0.080	0.080	0.130	0.130	0.120	0.090	0.100	0.230	0.510	0.230	0.150	0.130	0.120	0.150	0.060	0.110	0.120	0.080	0.160	0.100	0.130	0.090	0.300	NA	<0.001	<0.001	<0.001	<0.001	<0.001	0.240	<0.001	0.040	<0.001	<0.001	0.040	<0.001	0.999
WOR Age 11 - Parent	0.190	0.210	0.280	0.220	0.160	0.110	0.130	0.100	0.110	0.080	0.120	0.080	0.170	0.130	0.160	0.290	0.240	0.370	0.260	0.230	0.190	0.260	0.140	0.050	0.160	0.140	0.170	0.160	0.160	0.200	0.460	0.330	NA	<0.001	<0.001	<0.001	<0.001	<0.001	<0.001	<0.001	<0.001	<0.001	<0.001	<0.001	<0.001
DEP Age 11 - Parent	0.100	0.120	0.130	0.210	0.200	0.150	0.170	0.030	0.050	0.050	0.050	0.070	0.110	0.090	0.090	0.230	0.130	0.230	0.380	0.290	0.240	0.300	0.120	0.090	0.140	0.080	0.170	0.190	0.180	0.190	0.380	0.210	0.460	NA	<0.001	<0.001	<0.001	<0.001	<0.001	<0.001	0.030	<0.001	<0.001	<0.001	<0.001
NHA Age 11 - Parent	0.140	0.120	0.150	0.250	0.290	0.220	0.170	0.140	0.160	0.080	0.080	0.140	0.160	0.150	0.160	0.240	0.130	0.180	0.370	0.400	0.290	0.300	0.190	0.130	0.170	0.120	0.190	0.220	0.190	0.220	0.390	0.200	0.360	0.520	NA	<0.001	<0.001	<0.001	<0.001	<0.001	<0.001	<0.001	<0.001	<0.001	<0.001
TEN Age 11 - Parent	0.090	0.120	0.130	0.200	0.240	0.330	0.120	0.080	0.050	0.030	0.050	0.060	0.070	0.080	0.100	0.180	0.130	0.180	0.280	0.340	0.470	0.320	0.090	0.080	0.060	0.040	0.130	0.100	0.100	0.160	0.270	0.180	0.290	0.350	0.390	NA	<0.001	<0.001	<0.001	0.070	0.999	<0.001	<0.001	<0.001	<0.001
DIS Age 11 - Parent	0.170	0.160	0.190	0.230	0.220	0.190	0.190	0.120	0.090	0.100	0.080	0.130	0.180	0.140	0.140	0.280	0.180	0.210	0.330	0.300	0.230	0.340	0.210	0.110	0.130	0.110	0.210	0.240	0.200	0.200	0.410	0.280	0.420	0.610	0.530	0.380	NA	<0.001	<0.001	<0.001	0.020	<0.001	<0.001	<0.001	<0.001
IMP Age 11 - Parent	0.170	0.060	0.080	0.070	0.110	0.090	0.050	0.450	0.210	0.230	0.260	0.170	0.250	0.270	0.260	0.220	0.060	0.120	0.130	0.160	0.070	0.130	0.540	0.260	0.330	0.320	0.260	0.310	0.280	0.250	0.340	0.090	0.200	0.180	0.220	0.140	0.220	NA	<0.001	<0.001	<0.001	<0.001	<0.001	<0.001	<0.001
DWA Age 11 - Parent	0.110	0.060	0.080	-0.010	0.050	0.050	0.010	0.210	0.290	0.210	0.190	0.160	0.200	0.220	0.170	0.210	0.080	0.100	0.080	0.120	0.140	0.110	0.250	0.400	0.260	0.270	0.300	0.260	0.240	0.180	0.280	0.160	0.220	0.180	0.160	0.170	0.180	0.320	NA	<0.001	<0.001	<0.001	<0.001	<0.001	<0.001
RES Age 11 - Parent	0.180	0.040	0.090	<0.001	0.030	0.020	<0.001	0.240	0.210	0.460	0.460	0.270	0.280	0.330	0.230	0.300	0.050	0.150	0.130	0.130	0.050	0.130	0.330	0.280	0.550	0.530	0.340	0.340	0.360	0.290	0.400	0.120	0.230	0.170	0.160	0.100	0.170	0.400	0.370	NA	<0.001	<0.001	<0.001	<0.001	<0.001
FID Age 11 - Parent	0.160	-0.010	0.100	0.020	0.040	0.040	0.090	0.260	0.190	0.430	0.470	0.220	0.230	0.250	0.190	0.290	0.070	0.090	0.090	0.070	0.040	0.100	0.350	0.270	0.470	0.630	0.320	0.320	0.340	0.200	0.370	0.150	0.190	0.110	0.160	0.080	0.120	0.370	0.270	0.640	NA	<0.001	<0.001	<0.001	<0.001
CSE Age 11 - Parent	0.130	0.050	0.080	0.020	0.030	0.050	0.020	0.200	0.210	0.250	0.240	0.350	0.370	0.360	0.270	0.270	0.060	0.130	0.110	0.150	0.130	0.140	0.260	0.220	0.350	0.280	0.470	0.440	0.440	0.370	0.360	0.150	0.260	0.230	0.220	0.180	0.220	0.370	0.340	0.440	0.370	NA	<0.001	<0.001	<0.001
DTB Age 11 - Parent	0.120	0.040	0.060	0.060	0.070	0.020	0.050	0.260	0.240	0.270	0.250	0.300	0.430	0.400	0.320	0.260	0.060	0.100	0.140	0.150	0.080	0.130	0.370	0.220	0.340	0.310	0.420	0.520	0.500	0.420	0.340	0.130	0.260	0.260	0.210	0.170	0.250	0.430	0.320	0.470	0.370	0.650	NA	<0.001	<0.001
CON Age 11 - Parent	0.160	0.080	0.030	0.030	0.030	0.030	0.020	0.220	0.240	0.300	0.260	0.310	0.400	0.390	0.320	0.260	0.050	0.120	0.130	0.130	0.080	0.140	0.310	0.230	0.360	0.270	0.410	0.450	0.460	0.410	0.380	0.140	0.230	0.220	0.230	0.160	0.230	0.390	0.300	0.480	0.370	0.680	0.720	NA	<0.001
INA Age 11 - Parent	0.120	0.070	0.090	0.130	0.080	0.100	0.060	0.290	0.160	0.210	0.220	0.220	0.370	0.360	0.370	0.210	0.010	0.090	0.160	0.150	0.140	0.150	0.310	0.170	0.300	0.230	0.290	0.390	0.380	0.490	0.320	0.090	0.250	0.270	0.260	0.190	0.220	0.370	0.230	0.380	0.310	0.480	0.600	0.570	NA
