# Supplementary material for: Developmental Relations Between Internalising Problems and ADHD in Childhood: a Symptom Level Perspective
Source: Res Child Adolesc Psychopathol. 2021 Aug 7;49(12):1567–79. doi: 10.1007/s10802-021-00856-3 (PMC8557182; doi:10.1007/s10802-021-00856-3)
Supplement: Supplementary file 2 — Supplementary file2 (CSV 14 KB) [file 10802_2021_856_MOESM2_ESM.csv]

Developmental Relations between Internalising Problems and ADHD in Childhood: A Symptom Level Perspective Submitted to Journal of Abnormal Child Psychology
	NER Age 7 - Teacher	ANX Age 7 - Teacher	WOR Age 7 - Teacher	DEP Age 7 - Teacher	NHA Age 7 - Teacher	TEN Age 7 - Teacher	DIS Age 7 - Teacher	IMP Age 7 - Teacher	DWA Age 7 - Teacher	RES Age 7 - Teacher	FID Age 7 - Teacher	CSE Age 7 - Teacher	DTB Age 7 - Teacher	CON Age 7 - Teacher	INA Age 7 - Teacher	NER Age 9 - Teacher	ANX Age 9 - Teacher	WOR Age 9 - Teacher	DEP Age 9 - Teacher	NHA Age 9 - Teacher	TEN Age 9 - Teacher	DIS Age 9 - Teacher	IMP Age 9 - Teacher	DWA Age 9 - Teacher	RES Age 9 - Teacher	FID Age 9 - Teacher	CSE Age 9 - Teacher	DTB Age 9 - Teacher	CON Age 9 - Teacher	INA Age 9 - Teacher	NER Age 11 - Teacher	ANX Age 11 - Teacher	WOR Age 11 - Teacher	DEP Age 11 - Teacher	NHA Age 11 - Teacher	TEN Age 11 - Teacher	DIS Age 11 - Teacher	IMP Age 11 - Teacher	DWA Age 11 - Teacher	RES Age 11 - Teacher	FID Age 11 - Teacher	CSE Age 11 - Teacher	DTB Age 11 - Teacher	CON Age 11 - Teacher	INA Age 11 - Teacher
NER Age 7 - Teacher	NA	<0.001	<0.001	<0.001	<0.001	<0.001	<0.001	<0.001	<0.001	<0.001	<0.001	<0.001	<0.001	<0.001	<0.001	<0.001	<0.001	<0.001	<0.001	<0.001	<0.001	<0.001	<0.001	<0.001	<0.001	<0.001	<0.001	<0.001	<0.001	0.050	<0.001	<0.001	<0.001	0.110	<0.001	0.550	<0.001	<0.001	0.080	<0.001	<0.001	0.010	0.080	<0.001	0.040
ANX Age 7 - Teacher	0.470	NA	<0.001	<0.001	<0.001	<0.001	<0.001	0.999	<0.001	0.200	0.020	<0.001	<0.001	<0.001	<0.001	<0.001	<0.001	<0.001	0.010	0.020	0.010	<0.001	0.999	0.999	0.999	0.999	0.010	<0.001	<0.001	0.999	<0.001	<0.001	<0.001	0.020	0.010	<0.001	<0.001	0.999	0.999	0.999	0.999	0.999	0.999	0.700	0.500
WOR Age 7 - Teacher	0.580	0.670	NA	<0.001	<0.001	<0.001	<0.001	0.370	<0.001	<0.001	<0.001	<0.001	<0.001	<0.001	<0.001	<0.001	<0.001	<0.001	<0.001	<0.001	<0.001	<0.001	0.100	0.999	0.020	0.120	<0.001	0.080	<0.001	0.999	<0.001	<0.001	<0.001	0.020	<0.001	0.010	<0.001	0.999	0.999	0.999	0.550	0.999	0.999	0.999	0.510
DEP Age 7 - Teacher	0.440	0.460	0.630	NA	<0.001	<0.001	<0.001	0.010	<0.001	0.060	0.040	0.050	<0.001	<0.001	<0.001	<0.001	<0.001	<0.001	<0.001	<0.001	<0.001	<0.001	0.130	0.470	0.999	0.999	0.999	0.110	<0.001	<0.001	<0.001	0.020	<0.001	<0.001	<0.001	<0.001	<0.001	0.999	0.999	0.999	0.999	0.999	0.999	0.999	<0.001
NHA Age 7 - Teacher	0.450	0.450	0.600	0.820	NA	<0.001	<0.001	0.070	<0.001	0.120	0.070	0.060	<0.001	<0.001	<0.001	<0.001	0.999	<0.001	<0.001	<0.001	<0.001	<0.001	0.420	0.380	<0.001	0.790	0.610	0.010	<0.001	0.020	<0.001	0.999	<0.001	<0.001	<0.001	<0.001	<0.001	0.150	0.999	0.999	0.999	0.999	0.999	0.999	0.460
TEN Age 7 - Teacher	0.340	0.430	0.520	0.680	0.700	NA	<0.001	0.999	<0.001	0.600	0.999	<0.001	0.220	<0.001	0.010	0.020	0.080	0.160	<0.001	<0.001	<0.001	<0.001	0.999	0.999	0.999	0.999	0.999	0.999	0.999	0.999	0.030	0.999	0.150	0.010	<0.001	<0.001	<0.001	0.999	0.999	0.999	0.999	0.999	0.999	0.999	0.460
DIS Age 7 - Teacher	0.360	0.400	0.560	0.770	0.770	0.630	NA	0.450	<0.001	0.010	0.180	<0.001	<0.001	0.010	<0.001	<0.001	<0.001	0.010	<0.001	<0.001	<0.001	<0.001	0.999	0.999	0.999	0.050	0.999	0.640	0.220	0.999	<0.001	0.270	0.100	<0.001	<0.001	<0.001	<0.001	0.999	0.999	0.999	0.700	0.999	0.999	0.999	0.999
IMP Age 7 - Teacher	0.490	0.110	0.200	0.240	0.260	0.140	0.230	NA	<0.001	<0.001	<0.001	<0.001	<0.001	<0.001	<0.001	<0.001	0.999	0.280	0.010	0.070	0.999	0.050	<0.001	<0.001	<0.001	<0.001	<0.001	<0.001	<0.001	<0.001	<0.001	0.999	0.650	0.999	0.030	0.999	0.040	<0.001	<0.001	<0.001	<0.001	<0.001	<0.001	<0.001	<0.001
DWA Age 7 - Teacher	0.450	0.050	0.170	0.210	0.220	0.130	0.180	0.730	NA	<0.001	<0.001	<0.001	<0.001	<0.001	<0.001	<0.001	0.999	0.030	0.060	0.999	0.999	<0.001	<0.001	<0.001	<0.001	<0.001	<0.001	<0.001	<0.001	<0.001	<0.001	0.720	0.080	0.999	<0.001	0.999	0.470	<0.001	<0.001	<0.001	<0.001	<0.001	<0.001	<0.001	<0.001
RES Age 7 - Teacher	0.510	0.100	0.200	0.200	0.210	0.120	0.170	0.710	0.740	NA	<0.001	<0.001	<0.001	<0.001	<0.001	<0.001	<0.001	0.210	0.590	0.999	0.999	0.999	<0.001	<0.001	<0.001	<0.001	<0.001	<0.001	<0.001	<0.001	<0.001	0.999	0.180	0.999	0.770	0.999	0.100	<0.001	<0.001	<0.001	<0.001	<0.001	<0.001	<0.001	<0.001
FID Age 7 - Teacher	0.510	0.080	0.190	0.190	0.180	0.100	0.150	0.640	0.680	0.900	NA	<0.001	<0.001	<0.001	<0.001	<0.001	0.030	<0.001	0.999	0.999	0.999	0.480	<0.001	<0.001	<0.001	<0.001	<0.001	<0.001	<0.001	<0.001	<0.001	0.010	<0.001	0.999	0.670	0.999	0.480	<0.001	<0.001	<0.001	<0.001	<0.001	<0.001	<0.001	<0.001
CSE Age 7 - Teacher	0.420	0.170	0.240	0.290	0.320	0.220	0.270	0.550	0.540	0.650	0.630	NA	<0.001	<0.001	<0.001	<0.001	<0.001	0.999	0.999	0.220	0.830	0.440	<0.001	<0.001	<0.001	<0.001	<0.001	<0.001	<0.001	<0.001	<0.001	<0.001	0.999	0.999	0.010	0.999	0.010	<0.001	<0.001	<0.001	<0.001	<0.001	<0.001	<0.001	<0.001
DTB Age 7 - Teacher	0.400	0.170	0.230	0.290	0.290	0.190	0.250	0.560	0.530	0.630	0.590	0.830	NA	<0.001	<0.001	<0.001	0.120	0.310	0.130	0.020	0.670	0.999	<0.001	<0.001	<0.001	<0.001	<0.001	<0.001	<0.001	<0.001	<0.001	0.030	<0.001	0.020	<0.001	0.999	<0.001	<0.001	<0.001	<0.001	<0.001	<0.001	<0.001	<0.001	<0.001
CON Age 7 - Teacher	0.430	0.210	0.270	0.330	0.340	0.250	0.300	0.560	0.530	0.630	0.610	0.830	0.900	NA	<0.001	<0.001	0.999	0.510	0.760	0.130	0.580	0.999	<0.001	<0.001	<0.001	<0.001	<0.001	<0.001	<0.001	<0.001	<0.001	0.510	0.060	0.770	<0.001	0.999	<0.001	<0.001	<0.001	<0.001	<0.001	<0.001	<0.001	<0.001	<0.001
INA Age 7 - Teacher	0.400	0.200	0.280	0.360	0.370	0.260	0.310	0.560	0.490	0.570	0.540	0.730	0.790	0.830	NA	<0.001	0.999	0.050	<0.001	<0.001	0.050	0.390	<0.001	<0.001	<0.001	<0.001	<0.001	<0.001	<0.001	<0.001	<0.001	0.500	<0.001	0.550	<0.001	0.380	<0.001	<0.001	<0.001	<0.001	<0.001	<0.001	<0.001	<0.001	<0.001
NER Age 9 - Teacher	0.450	0.250	0.330	0.230	0.240	0.200	0.190	0.330	0.280	0.350	0.340	0.310	0.310	0.330	0.320	NA	<0.001	<0.001	<0.001	<0.001	<0.001	<0.001	<0.001	<0.001	<0.001	<0.001	<0.001	<0.001	<0.001	<0.001	<0.001	<0.001	<0.001	<0.001	<0.001	<0.001	<0.001	<0.001	<0.001	<0.001	<0.001	<0.001	<0.001	<0.001	<0.001
ANX Age 9 - Teacher	0.290	0.420	0.390	0.310	0.320	0.280	0.260	0.100	0.050	0.130	0.100	0.170	0.150	0.170	0.180	0.520	NA	<0.001	<0.001	<0.001	<0.001	<0.001	0.010	0.010	0.050	<0.001	<0.001	<0.001	<0.001	0.999	<0.001	<0.001	<0.001	<0.001	<0.001	0.020	<0.001	0.999	0.890	0.999	0.999	0.999	0.999	0.999	0.999
WOR Age 9 - Teacher	0.340	0.330	0.400	0.320	0.320	0.270	0.300	0.180	0.150	0.170	0.160	0.190	0.170	0.200	0.210	0.620	0.720	NA	<0.001	<0.001	<0.001	<0.001	<0.001	0.140	<0.001	<0.001	0.020	<0.001	<0.001	<0.001	<0.001	<0.001	<0.001	<0.001	<0.001	<0.001	<0.001	<0.001	0.130	<0.001	0.310	<0.001	0.100	<0.001	0.030
DEP Age 9 - Teacher	0.320	0.280	0.360	0.420	0.390	0.320	0.400	0.230	0.180	0.210	0.170	0.220	0.210	0.220	0.250	0.510	0.590	0.710	NA	<0.001	<0.001	<0.001	<0.001	<0.001	<0.001	<0.001	<0.001	<0.001	<0.001	<0.001	<0.001	<0.001	<0.001	<0.001	<0.001	<0.001	<0.001	<0.001	0.890	0.010	0.430	0.130	<0.001	<0.001	<0.001
NHA Age 9 - Teacher	0.310	0.290	0.380	0.430	0.430	0.370	0.400	0.230	0.170	0.210	0.170	0.220	0.210	0.210	0.260	0.500	0.560	0.660	0.850	NA	<0.001	<0.001	<0.001	<0.001	<0.001	0.770	<0.001	<0.001	<0.001	<0.001	<0.001	0.160	<0.001	<0.001	<0.001	<0.001	<0.001	<0.001	0.030	<0.001	0.999	<0.001	<0.001	<0.001	<0.001
TEN Age 9 - Teacher	0.250	0.260	0.300	0.350	0.340	0.400	0.330	0.160	0.090	0.100	0.080	0.150	0.150	0.150	0.170	0.430	0.460	0.520	0.670	0.730	NA	<0.001	0.010	<0.001	0.999	0.999	<0.001	<0.001	<0.001	<0.001	<0.001	0.060	<0.001	<0.001	<0.001	<0.001	<0.001	0.999	0.010	0.999	0.999	<0.001	0.420	0.790	<0.001
DIS Age 9 - Teacher	0.230	0.230	0.310	0.350	0.350	0.290	0.380	0.160	0.110	0.130	0.100	0.170	0.170	0.180	0.210	0.450	0.490	0.590	0.770	0.790	0.690	NA	<0.001	<0.001	<0.001	<0.001	<0.001	<0.001	<0.001	<0.001	<0.001	<0.001	<0.001	<0.001	<0.001	<0.001	<0.001	0.010	0.020	0.030	0.240	<0.001	<0.001	<0.001	<0.001
IMP Age 9 - Teacher	0.310	0.050	0.160	0.170	0.190	0.100	0.180	0.530	0.480	0.530	0.470	0.400	0.400	0.390	0.410	0.520	0.190	0.300	0.330	0.330	0.290	0.300	NA	<0.001	<0.001	<0.001	<0.001	<0.001	<0.001	<0.001	<0.001	0.999	<0.001	0.050	<0.001	0.130	<0.001	<0.001	<0.001	<0.001	<0.001	<0.001	<0.001	<0.001	<0.001
DWA Age 9 - Teacher	0.330	0.040	0.140	0.140	0.150	0.080	0.120	0.470	0.500	0.500	0.450	0.330	0.360	0.360	0.350	0.500	0.180	0.240	0.260	0.260	0.260	0.240	0.760	NA	<0.001	<0.001	<0.001	<0.001	<0.001	<0.001	<0.001	0.040	0.999	0.100	0.220	0.990	0.090	<0.001	<0.001	<0.001	<0.001	<0.001	<0.001	<0.001	<0.001
RES Age 9 - Teacher	0.370	0.100	0.180	0.130	0.140	0.080	0.110	0.480	0.460	0.570	0.520	0.410	0.390	0.390	0.390	0.540	0.220	0.280	0.280	0.270	0.250	0.250	0.710	0.730	NA	<0.001	<0.001	<0.001	<0.001	<0.001	<0.001	0.030	<0.001	<0.001	<0.001	0.999	0.010	<0.001	<0.001	<0.001	<0.001	<0.001	<0.001	<0.001	<0.001
FID Age 9 - Teacher	0.360	0.050	0.140	0.110	0.100	0.030	0.090	0.450	0.440	0.550	0.530	0.390	0.380	0.370	0.370	0.510	0.160	0.250	0.250	0.220	0.200	0.210	0.670	0.680	0.910	NA	<0.001	<0.001	<0.001	<0.001	<0.001	0.220	0.060	0.720	0.420	0.999	0.150	<0.001	<0.001	<0.001	<0.001	<0.001	<0.001	<0.001	<0.001
CSE Age 9 - Teacher	0.320	0.140	0.190	0.200	0.200	0.130	0.170	0.410	0.370	0.480	0.420	0.530	0.540	0.550	0.520	0.450	0.290	0.300	0.330	0.330	0.280	0.310	0.590	0.540	0.670	0.650	NA	<0.001	<0.001	<0.001	<0.001	<0.001	<0.001	<0.001	<0.001	<0.001	<0.001	<0.001	<0.001	<0.001	<0.001	<0.001	<0.001	<0.001	<0.001
DTB Age 9 - Teacher	0.300	0.120	0.170	0.220	0.210	0.140	0.190	0.430	0.400	0.480	0.430	0.540	0.570	0.570	0.530	0.440	0.260	0.290	0.320	0.320	0.270	0.280	0.580	0.530	0.650	0.630	0.870	NA	<0.001	<0.001	<0.001	0.110	<0.001	<0.001	<0.001	0.320	<0.001	<0.001	<0.001	<0.001	<0.001	<0.001	<0.001	<0.001	<0.001
CON Age 9 - Teacher	0.290	0.130	0.180	0.220	0.220	0.160	0.210	0.390	0.350	0.430	0.380	0.520	0.550	0.560	0.530	0.460	0.270	0.320	0.350	0.350	0.290	0.310	0.560	0.500	0.620	0.610	0.860	0.910	NA	<0.001	<0.001	0.010	<0.001	<0.001	<0.001	0.190	<0.001	<0.001	<0.001	<0.001	<0.001	<0.001	<0.001	<0.001	<0.001
INA Age 9 - Teacher	0.260	0.110	0.170	0.220	0.220	0.170	0.220	0.380	0.330	0.410	0.340	0.470	0.490	0.510	0.520	0.440	0.250	0.300	0.350	0.350	0.330	0.340	0.550	0.490	0.610	0.600	0.800	0.830	0.860	NA	<0.001	0.999	<0.001	<0.001	<0.001	<0.001	<0.001	<0.001	<0.001	<0.001	<0.001	<0.001	<0.001	<0.001	<0.001
NER Age 11 - Teacher	0.250	0.100	0.210	0.180	0.180	0.130	0.160	0.230	0.240	0.260	0.230	0.260	0.240	0.250	0.250	0.240	0.190	0.210	0.220	0.240	0.150	0.180	0.260	0.210	0.260	0.250	0.280	0.270	0.250	0.250	NA	<0.001	<0.001	<0.001	<0.001	<0.001	<0.001	<0.001	<0.001	<0.001	<0.001	<0.001	<0.001	<0.001	<0.001
ANX Age 11 - Teacher	0.150	0.200	0.200	0.150	0.160	0.120	0.120	0.040	0.030	0.050	0.050	0.100	0.090	0.120	0.130	0.110	0.250	0.200	0.180	0.180	0.110	0.160	<0.001	-0.020	0.020	0.020	0.080	0.100	0.090	0.090	0.500	NA	<0.001	<0.001	<0.001	<0.001	<0.001	0.240	<0.001	0.040	<0.001	<0.001	0.040	<0.001	0.999
WOR Age 11 - Teacher	0.190	0.140	0.180	0.160	0.180	0.100	0.150	0.120	0.120	0.130	0.120	0.180	0.170	0.190	0.180	0.150	0.190	0.210	0.200	0.190	0.120	0.170	0.080	0.070	0.090	0.080	0.150	0.150	0.140	0.150	0.620	0.670	NA	<0.001	<0.001	<0.001	<0.001	<0.001	<0.001	<0.001	<0.001	<0.001	<0.001	<0.001	<0.001
DEP Age 11 - Teacher	0.200	0.140	0.180	0.220	0.250	0.180	0.190	0.140	0.150	0.140	0.120	0.160	0.190	0.200	0.220	0.140	0.160	0.170	0.220	0.240	0.180	0.210	0.100	0.080	0.110	0.070	0.150	0.160	0.140	0.160	0.510	0.520	0.700	NA	<0.001	<0.001	<0.001	<0.001	<0.001	<0.001	0.030	<0.001	<0.001	<0.001	<0.001
NHA Age 11 - Teacher	0.230	0.160	0.190	0.200	0.230	0.180	0.190	0.140	0.180	0.150	0.140	0.190	0.190	0.200	0.220	0.150	0.140	0.200	0.230	0.250	0.160	0.210	0.100	0.080	0.100	0.080	0.150	0.160	0.140	0.170	0.490	0.540	0.660	0.840	NA	<0.001	<0.001	<0.001	<0.001	<0.001	<0.001	<0.001	<0.001	<0.001	<0.001
TEN Age 11 - Teacher	0.180	0.150	0.190	0.180	0.170	0.170	0.160	0.080	0.130	0.080	0.090	0.100	0.120	0.150	0.160	0.120	0.090	0.140	0.190	0.210	0.180	0.200	0.070	0.090	0.070	0.060	0.090	0.080	0.090	0.120	0.410	0.470	0.540	0.680	0.770	NA	<0.001	<0.001	<0.001	0.070	0.999	<0.001	<0.001	<0.001	<0.001
DIS Age 11 - Teacher	0.170	0.120	0.160	0.170	0.190	0.170	0.180	0.130	0.140	0.120	0.100	0.150	0.160	0.180	0.200	0.090	0.080	0.100	0.180	0.190	0.140	0.160	0.080	0.070	0.060	0.030	0.090	0.080	0.080	0.090	0.430	0.480	0.590	0.780	0.760	0.710	NA	<0.001	<0.001	<0.001	0.020	<0.001	<0.001	<0.001	<0.001
IMP Age 11 - Teacher	0.240	<0.001	0.110	0.130	0.110	0.060	0.110	0.380	0.400	0.450	0.390	0.310	0.330	0.310	0.330	0.240	0.030	0.120	0.160	0.170	0.080	0.120	0.430	0.370	0.400	0.380	0.320	0.350	0.310	0.320	0.490	0.120	0.240	0.280	0.270	0.220	0.240	NA	<0.001	<0.001	<0.001	<0.001	<0.001	<0.001	<0.001
DWA Age 11 - Teacher	0.210	-0.060	0.060	0.100	0.080	0.030	0.080	0.340	0.400	0.410	0.380	0.260	0.260	0.250	0.270	0.200	-0.040	0.050	0.100	0.120	0.030	0.060	0.410	0.370	0.400	0.390	0.290	0.290	0.260	0.250	0.410	0.020	0.140	0.210	0.200	0.190	0.180	0.750	NA	<0.001	<0.001	<0.001	<0.001	<0.001	<0.001
RES Age 11 - Teacher	0.290	<0.001	0.130	0.130	0.110	0.040	0.090	0.370	0.390	0.460	0.430	0.340	0.340	0.330	0.330	0.260	0.030	0.090	0.150	0.140	0.060	0.100	0.440	0.370	0.460	0.450	0.370	0.370	0.340	0.340	0.460	0.080	0.210	0.220	0.210	0.160	0.160	0.710	0.750	NA	<0.001	<0.001	<0.001	<0.001	<0.001
FID Age 11 - Teacher	0.280	-0.010	0.130	0.130	0.100	0.040	0.100	0.370	0.360	0.440	0.410	0.310	0.300	0.300	0.300	0.260	0.030	0.090	0.160	0.150	0.060	0.120	0.420	0.360	0.430	0.420	0.360	0.350	0.330	0.320	0.440	0.090	0.180	0.190	0.190	0.150	0.150	0.680	0.720	0.910	NA	<0.001	<0.001	<0.001	<0.001
CSE Age 11 - Teacher	0.240	0.050	0.160	0.180	0.170	0.120	0.160	0.330	0.330	0.380	0.330	0.420	0.440	0.440	0.430	0.250	0.100	0.150	0.170	0.210	0.120	0.170	0.360	0.280	0.350	0.350	0.430	0.440	0.420	0.430	0.430	0.200	0.300	0.350	0.360	0.260	0.290	0.630	0.570	0.670	0.650	NA	<0.001	<0.001	<0.001
DTB Age 11 - Teacher	0.250	0.050	0.150	0.180	0.150	0.100	0.140	0.340	0.340	0.410	0.360	0.430	0.450	0.450	0.450	0.250	0.110	0.150	0.170	0.200	0.100	0.160	0.370	0.280	0.370	0.370	0.430	0.460	0.450	0.460	0.440	0.220	0.290	0.330	0.340	0.240	0.280	0.620	0.550	0.660	0.630	0.860	NA	<0.001	<0.001
CON Age 11 - Teacher	0.240	0.060	0.170	0.180	0.160	0.110	0.140	0.330	0.310	0.380	0.330	0.440	0.450	0.460	0.450	0.260	0.120	0.150	0.190	0.220	0.120	0.180	0.360	0.290	0.370	0.360	0.450	0.470	0.450	0.470	0.430	0.220	0.300	0.360	0.360	0.260	0.290	0.600	0.520	0.630	0.620	0.880	0.900	NA	<0.001
INA Age 11 - Teacher	0.210	0.050	0.140	0.170	0.170	0.130	0.130	0.310	0.300	0.360	0.310	0.390	0.410	0.430	0.440	0.230	0.080	0.130	0.160	0.190	0.120	0.140	0.340	0.260	0.340	0.330	0.400	0.430	0.420	0.440	0.400	0.230	0.300	0.360	0.350	0.260	0.320	0.580	0.510	0.590	0.550	0.790	0.830	0.850	NA
